# Supplementary material for: Small-fragment, high turnover: soil microenvironment fluctuation effect on tree diversity in a Neotropical montane oak forest
Source: PeerJ. 2023 May 23;11:e15415. doi: 10.7717/peerj.15415 (PMC10215762; doi:10.7717/peerj.15415)
Supplement: Supplemental Information 1 [file peerj-11-15415-s001.xlsx]

## Sheet: Microenvironment
2019-03-22	Moisture	Temp_°C	Depth litter (cm)	Density (empty plots)	pH	2019-05-24	Moisture	Temp_°C	Depth litter (cm)	Density (empty plots)	pH	2019-08-10	Moisture	Temp_°C	Depth litter (cm)	Density (empty plots)	pH	2019-10-27	Moisture	Temp_°C	Depth litter (cm)	Density (empty plots)	pH
T1C1	7.5	2	4.5	0	6.8	T1C1	1	6	1	0	6.8	T1C1	8	3	1.5	0	6	T1C1	6.8	-1	3	0	6.4
T1C1	4	4	4	0	6.5	T1C1	1	5	3	0	6.8	T1C1	1	2	1.5	0	6.2	T1C1	7	-1	8	0	6.2
T1C1	7.5	1.5	3.5	0	6.5	T1C1	1	5	2.5	0	6.8	T1C1	7	2	4.3	0	6	T1C1	7	-1	2	0	6.2
T1C1	5	2	4	0	6.6	T1C1	1	4	1	0	6.8	T1C1	1	3	2	0	6.4	T1C1	6.8	0	3	0	6.2
T1C2	6	-3	1	0	6.8	T1C2	2	5	7.5	0	6.8	T1C2	5	4	4	0	6.4	T1C2	7	-2	10	0	6.4
T1C2	8	-1	3	1	6.4	T1C2	6	4	6.5	0	6.8	T1C2	8	2	10	0	6.3	T1C2	7	-1	5.4	0	6.8
T1C2	8	0	3	0	6.6	T1C2	4	4	5.5	0	6.6	T1C2	7	3	4.5	1	6.4	T1C2	6.8	-1	4.5	0	6.6
T1C2	5	-1	2	1	6.6	T1C2	3	4	2	0	6.8	T1C2	7	4	4	1	6.4	T1C2	7	-1	4.5	0	6.2
T1C3	8	1	4	0	6.8	T1C3	1	5	7.5	0	7	T1C3	6	2	8.5	0	6.4	T1C3	6.8	-1	8	0	6.8
T1C3	8	1	5	1	6.4	T1C3	1	5	9.5	0	7	T1C3	8	2	4	0	6.2	T1C3	6.8	0	9.5	0	6.8
T1C3	8	0	5	0	6.6	T1C3	1	4	4.5	0	6.6	T1C3	5	2	4	0	6.2	T1C3	6.8	-1	7	0	6.6
T1C3	7	1	6	1	6.6	T1C3	1	4	3	0	6.8	T1C3	6	2	6	0	6.2	T1C3	6.8	-1	9.5	0	6.2
T2C1	5	0	3	0	6.6	T2C1	1	3	6.5	0	7	T2C1	2	3	11	0	6.4	T2C1	7	0	3	0	6.4
T2C1	3	1.11111	2.5	0	6.8	T2C1	1	3	7	0	7	T2C1	2	4	8	0	6.4	T2C1	6.8	0	8	0	6.8
T2C1	4.5	0	3	0	6.6	T2C1	1	4	5	0	6.8	T2C1	2	4	6	0	6.8	T2C1	7	0	5	0	6.4
T2C1	7	3.33333	6	0	6.6	T2C1	1	3	6	0	6.8	T2C1	1	3	2	0	6.7	T2C1	7	0	8.5	0	6
T2C2	3	-1.11111	1	4	6.6	T2C2	1	2	4	0	6.8	T2C2	3	3	4	0	6.4	T2C2	7	-1	6	0	6.4
T2C2	8	-1.11111	1	1	6.2	T2C2	1	2	5	0	6.8	T2C2	2	3	6	0	6.6	T2C2	7	-1	4	0	6.6
T2C2	8	0	1	0	6.4	T2C2	1	2	8	0	7	T2C2	2	2	8	0	6.6	T2C2	6.8	-1	7	0	6.8
T2C2	8	0	1	0	6.4	T2C2	2	2	9	0	6.4	T2C2	2	3	11	0	6.4	T2C2	6.2	-1	5.5	0	6.8
T2C3	7	0	3	1	6.4	T2C3	1	2	5.5	0	6.8	T2C3	3	2	5	0	6.4	T2C3	2	-1	2.5	0	6.2
T2C3	6	-1.11111	4	0	6.6	T2C3	1	2	9	0	6.6	T2C3	2	2	4	0	6.6	T2C3	7	-1	3.6	0	6.2
T2C3	8	0	8	0	6.4	T2C3	1	2	12	0	6.6	T2C3	6	2	8	0	6.6	T2C3	6.8	-1	6	0	6
T2C3	7	0	4	1	6.4	T2C3	1	2	11	0	6.8	T2C3	7	2	5	0	6.2	T2C3	7	-1	5.5	0	6.2
T3C1	8	-1.11111	4	0	6.4	T3C1	1	4	3	0	7	T3C1	8	2	4	1	6	T3C1	7	1	5	0	6
T3C1	8	-1.11111	6	6	6.4	T3C1	1	3	4	0	7	T3C1	7	3	4	0	6.4	T3C1	7	1	3	0	6.4
T3C1	5	-1.11111	7	18	6.6	T3C1	1	3	7	0	7	T3C1	4	3	2.5	0	6.4	T3C1	7	0	4.5	0	6.2
T3C1	8	0	4	28	6	T3C1	1	4	5	0	7	T3C1	4	2	2	0	6.6	T3C1	6.8	0	3.5	0	6.4
T3C2	6	0	2.5	1	6.8	T3C2	1	5	4	0	6	T3C2	6	3	10	0	6.4	T3C2	7	1	7	0	6
T3C2	8	-1.11111	2	0	6.8	T3C2	1	4	3	0	7	T3C2	5	3	8.5	1	6.4	T3C2	2	1	11	0	6.2
T3C2	6	-1.11111	1.5	8	6.4	T3C2	1	5	7	0	7	T3C2	8	2	4	0	6.2	T3C2	6.8	1	7.5	0	6.8
T3C2	7	-1.11111	3	1	6.4	T3C2	2	5	6	0	7	T3C2	7	2	4	0	6.4	T3C2	7	0	4	0	6
T3C3	5	-1.11111	1	1	6.6	T3C3	5	4	2	0	6.2	T3C3	4	1	9	0	6	T3C3	6.8	0	3.5	0	6.6
T3C3	2	-1.11111	4	0	6.8	T3C3	3	2	3	1	6.4	T3C3	2	0	5.5	0	6.2	T3C3	7	0	6.5	0	6.6
T3C3	8	-1.11111	7	1	6.2	T3C3	3	2	1	2	6.2	T3C3	2	1	3	0	6.6	T3C3	7	1	5.5	0	6
T3C3	6	-2.22222	10	0	6.8	T3C3	3	2	1	2	6	T3C3	7	2	9	0	6.4	T3C3	6.8	0	3.6	0	6.2
T4C1	5	2	3.25	1	6.8	T4C1	1	4	10	0	7	T4C1	5	3	8	3	6.4	T4C1	6.8	0	7	0	6
T4C1	6.5	2	1.5	0	6.6	T4C1	2	3	3.5	0	6.8	T4C1	2	3	3.5	0	6.4	T4C1	7	-1	13	0	6
T4C1	4	1	5	0	6.8	T4C1	1	3	5.5	0	7	T4C1	4	2	7	0	6.2	T4C1	7	0	16	0	6.2
T4C1	4	1	3.5	0	6.6	T4C1	1	4	5.5	0	6.8	T4C1	3.5	3	8.5	0	6.4	T4C1	7	2	10	0	6.4
T4C2	3	2	1	0	6.9	T4C2	1	4	2.5	0	6.8	T4C2	3	3	7	1	6.4	T4C2	7	0	5	0	6.8
T4C2	8	1.5	0	0	6.6	T4C2	1	4	3.5	0	6.8	T4C2	6	3	5	0	6.4	T4C2	1	-1	15	0	6.4
T4C2	7	1	1.5	0	6.6	T4C2	1	4	5	0	7	T4C2	8	4	14	1	6.8	T4C2	7	-1	2.5	0	6.4
T4C2	6	1	0	1	6.6	T4C2	2	4	2	0	7	T4C2	4.5	3	1	0	6.4	T4C2	7	-1	4	0	6.6
T4C3	6.5	-1.66667	1	0	6.4	T4C3	1	3	2	0	6	T4C3	7	3	7.5	0	6.2	T4C3	7	0	0.5	0	6.6
T4C3	8	-2.22222	1	0	6.2	T4C3	1	4	3	0	6.8	T4C3	8	2	6.3	0	6.2	T4C3	7	0	1	0	6.6
T4C3	6	-3.33333	0.5	1	6.6	T4C3	1	3	2	0	6.4	T4C3	8	3	4	0	6.2	T4C3	7	1	3	0	6.7
T4C3	7	-2.22222	0	1	6.2	T4C3	1	3	2	0	6.6	T4C3	7.5	2	2	0	6.4	T4C3	6.8	-1	1	0	6.4
2019-03-22	Moisture	Temp_°C	Depth litter (cm)	Cobertura (cuadros libres)	pH	2019-05-24	Moisture	Temp_°C	Depth litter (cm)	Cobertura (cuadros libres)	pH	2019-08-10	Moisture	Temp_°C	Depth litter (cm)	Cobertura (cuadros libres)	pH	2019-10-27	Moisture	Temp_°C	Depth litter (cm)	Cobertura (cuadros libres)	pH
T1C1	6	2.375	4	0	6.6	T1C1	1	5	1.875	0	6.8	T1C1	4.25	2.5	2.325	0	6.15	T1C1	6.9	-0.75	4	0	6.25
T1C2	6.75	-1.25	2.25	0.5	6.6	T1C2	3.75	4.25	5.375	0	6.75	T1C2	6.75	3.25	5.625	0.5	6.375	T1C2	6.95	-1.25	6.1	0	6.5
T1C3	7.75	0.75	5	0.5	6.6	T1C3	1	4.5	6.125	0	6.85	T1C3	6.25	2	5.625	0	6.25	T1C3	6.8	-0.75	8.5	0	6.6
T2C1	4.875	1.11111	3.625	0	6.65	T2C1	1	3.25	6.125	0	6.9	T2C1	1.75	3.5	6.75	0	6.575	T2C1	6.95	0	6.125	0	6.4
T2C2	6.75	-0.555556	1	1.25	6.4	T2C2	1.25	2	6.5	0	6.75	T2C2	2.25	2.75	7.25	0	6.5	T2C2	6.75	-1	5.625	0	6.65
T2C3	7	-0.277778	4.75	0.5	6.45	T2C3	1	2	9.375	0	6.7	T2C3	4.5	2	5.5	0	6.45	T2C3	5.7	-1	4.4	0	6.15
T3C1	7.25	-0.833333	5.25	13	6.35	T3C1	1	3.5	4.75	0	7	T3C1	5.75	2.5	3.125	0.25	6.35	T3C1	6.95	0.5	4	0	6.25
T3C2	6.75	-0.833333	2.25	2.5	6.6	T3C2	1.25	4.75	5	0	6.75	T3C2	6.5	2.5	6.625	0.25	6.35	T3C2	5.7	0.75	7.375	0	6.25
T3C3	5.25	-1.38889	5.5	0.5	6.6	T3C3	3.5	2.5	1.75	1.25	6.2	T3C3	3.75	1	6.625	0	6.3	T3C3	6.9	0.25	4.775	0	6.35
T4C1	4.875	1.5	3.3125	0.25	6.7	T4C1	1.25	3.5	6.125	0	6.9	T4C1	3.625	2.75	6.75	0.75	6.35	T4C1	6.95	0.25	11.5	0	6.15
T4C2	6	1.375	0.625	0.25	6.675	T4C2	1.25	4	3.25	0	6.9	T4C2	5.375	3.25	6.75	0.5	6.5	T4C2	5.5	-0.75	6.625	0	6.55
T4C3	6.875	-2.36111	0.625	0.5	6.35	T4C3	1	3.25	2.25	0	6.45	T4C3	7.625	2.5	4.95	0	6.25	T4C3	6.95	0	1.375	0	6.575

## Sheet: Transect_4
	Distance (km)	Altitude	Common name	Tree species	DAP	C	H
T4C3	1	1879	Haya	Ostrya virginiana	53.5	35	15
T4C3	1	1879	Haya	Ostrya virginiana	4	8	2
T4C3			Haya	Ostrya virginiana	87
T4C3			P. serotina	Prunus serotina	3
T4C3			P. serotina	Prunus serotina	3.2
T4C3			P. serotina	Prunus serotina	2
T4C3			Haya	Ostrya virginiana	21.5
T4C3			Rosaceae	Perrotetia ovata	4
T4C3			Magnolia schediana	Magnolia schediana	35
T4C3			P. serotina	Prunus serotina	3
T4C3			P. serotina	Prunus serotina	7.5
T4C3			Rosaceae	Perrotetia ovata	13.2
T4C3			P. serotina	Prunus serotina	6.3
T4C3			P. serotina	Prunus serotina	5.7
T4C3			P. serotina	Prunus serotina	6.5
T4C3	3	1876	P. serotina	Prunus serotina	3	4.5	2
T4C3			Haya	Ostrya virginiana	26.5
T4C3	5	1876	Quercus 2	Quercus meavei	13.6	12	3
T4C3			P. serotina	Prunus serotina	3.7
T4C3			Haya 2	Ostrya virginiana	33.3
T4C3	9	1878	P. serotina	Prunus serotina	6	6	3
T4C3	10	1878	P. serotina	Prunus serotina	9	5	3
T4C3			Haya 2	Ostrya virginiana	53.5
T4C3			P. serotina	Prunus serotina	4.5
T4C3			P. serotina	Prunus serotina	1.7
T4C3	11.5	1872	Encino 3	Quercus trinitatis	7	11	5
T4C3		1872	P. serotina	Prunus serotina	3.2	3.5	1.8
T4C3			P. serotina	Prunus serotina	15.4
T4C3			P. serotina	Prunus serotina	8
T4C3			Q. laurina	Quercus delgaduana	66
T4C3			Hoja compuesta	Hoja compuesta	3.3
T4C3			Clethra	Clethra mexicana	19.2
T4C3			Clethra	Clethra mexicana	7
T4C3			P. serotina	Prunus serotina	6.2
T4C3			P. serotina	Prunus serotina	10
T4C3			P. serotina	Prunus serotina	6
T4C3			Hoja compuesta	Turpinia insignis	15
T4C3			P. serotina	Prunus serotina	24
T4C3			P. serotina	Prunus serotina	6.5
T4C3			Oreopanax	Oreopanax xalapensis	6
T4C3	17	1865	Helecho punta recta	Alsophila firma	13	4.5	2.3
T4C3	17	1865	Oreopanax	Oreopanax xalapensis	5.5	12	8
T4C3			Quercus laurina	Quercus delgadoana	19.3
	25		Helecho punta recta	Alsophila firma	15	2.5	4
	27	1864	Turpinia insignis	Turpinia insignis	9.2	12	5
	27	1864	P. serotina	Prunus serotina	3.7	4	2
	27	1864	Magnolia schediana	Magnolia schediana	9.2	11	5
	30	1864	Rubiaceae	Rubiaceae	11	7.3	5.3
	33	1854	P. serotina	Prunus serotina	5	7	4.5
	34	1853	P. serotina	Prunus serotina	7.2	8.5	6
	35	1853	Magnolia schediana	Magnolia schiedeana	6.5	33	15.6
	38	1853	P. serotina	Prunus serotina	6.8	8.4	6.8
			P. serotina	Prunus serotina	7
T4C2	40	1849	Magnolia schediana	Magnolia schiedeana	33	28	12
T4C2	40	1849	P. serotina	Prunus serotina	7.5	7	3
T4C2	41	1849	Clethra	Clethra mexicana	17	15	6
T4C2			P. serotina	Prunus serotina	5.7
T4C2			Magnolia schediana	Magnolia schiedeana	11.6
T4C2	45	1844	P. serotina	Prunus serotina	9	6	4.5
T4C2			Hoja compuesta	Turpinia insignis	30
T4C2			Solanaceae	Solanaceae	3.5
T4C2			Magnolia schediana	Magnolia schiedeana	54.5
T4C2	48	1849	P. serotina	Prunus serotina	18.3	6.5	4
T4C2	50	1850	Helecho punta recta	Alsophila firma	15.2	7	4
T4C2			Quercus laurina	Quercus delgadoana	30
T4C2			Helecho punta recta	Alsophila firma	20
T4C2			Helecho peludito	Dicksonia sellowiana	17.2
T4C2			Helecho punta recta	Alsophila firma	22.5
T4C2			Helecho punta recta	Alsophila firma	25.2
T4C2			Clethra	Clethra mexicana	17.2
T4C2	51	1856	Encino 3	Quercus insignis	5	5.5	3
T4C2	56	1856	Hoja peludita	Styrax glabrescens	48.5	38.5	8.5
T4C2			Helecho punta recta	Alsophila firma	25.2
T4C2	58	1860	Helecho punta recta	Alsophila firma	25	7	3
T4C2			P. serotina	Prunus serotina	12.5
T4C2			P. serotina	Prunus serotina	8
T4C2			P. serotina	Prunus serotina	52
	64	1879	P. serotina	Prunus serotina	12	7.5	4
	67	1879	P. serotina	Prunus serotina	11	8.5	5
	67	1879	Magnolia schediana	Magnolia schiedeana	28	35	12
	69	1879	Hoja compuesta	Turpinia insignis	8	11	6
	72	1879	Magnolia schediana	Magnolia schiedeana	41	35	18
			P. serotina	Prunus serotina	4
			P. serotina	Prunus serotina	4
			P. serotina	Prunus serotina	5
T4C1	80	1875	Aguacate	Beilschmiedia mexicana	4.2	7	4.2
T4C1			Aguacate	Beilschmiedia mexicana	2.3
T4C1			Aguacate	Beilschmiedia mexicana	1.5
T4C1			P. serotina	Prunus serotina	3.5
T4C1			P. serotina	Prunus serotina	4.5
T4C1			Aguacate	Beilschmiedia mexicana	5.2
T4C1			P. serotina	Prunus serotina	10.8
T4C1			P. serotina	Prunus serotina	2.4
T4C1			Aguacate	Beilschmiedia mexicana	3.7
T4C1			Haya	Ostrya virginiana	6.5
T4C1			P. serotina	Prunus serotina	22
T4C1	85	1881	Aguacate	Beilschmiedia mexicana	12.4	17	5
T4C1			P. serotina	Prunus serotina	2.5
T4C1			P. serotina	Prunus serotina	11.7
T4C1			Haya	Ostrya virginiana	83
T4C1	85	1881	P. serotina	Prunus serotina	25	11	7
T4C1	86		Aguacate	Beilschmiedia mexicana	1.8	2	1
T4C1			Magnolia schediana	Magnolia schiedeana	5.4
T4C1			Aguacate	Beilschmiedia mexicana	12
T4C1			P. serotina	Prunus serotina	9
T4C1	87	1881	P. serotina	Prunus serotina	4.5	12.5	7
T4C1			Aguacate	Beilschmiedia mexicana	17.8
T4C1			P. serotina	Prunus serotina	5.3
T4C1			Magnolia schediana	Magnolia schiedeana	13
T4C1			Magnolia schediana	Magnolia schiedeana	3.5
T4C1			Aguacate	Beilschmiedia mexicana	5.6
T4C1			P. serotina	Prunus serotina	9.5
T4C1			Quercus laurina	Quercus delgadoana	11
T4C1			P. serotina	Prunus serotina	7.5
T4C1			Aguacate	Beilschmiedia mexicana	2.6
T4C1			Aguacate	Beilschmiedia mexicana	4.5
T4C1			Haya	Fagus grandifolia subsp. mexicana	51
T4C1			Magnolia schediana	Magnolia schiedeana	11
T4C1			P. serotina	Prunus serotina	8
T4C1			Aguacate	Beilschmiedia mexicana	5.2
T4C1	91	1880	Aguacate	Beilschmiedia mexicana	2	2	1.5
T4C1	91	1880	Magnolia schediana	Magnolia schiedeana	29.7	27.8	12
T4C1			P. serotina	Prunus serotina	5.3
T4C1			Helecho punta recta	Alsophila firma	13
T4C1			Helecho punta recta	Alsophila firma	17
T4C1			Aguacate	Beilschmiedia mexicana	12.5
T4C1	94	1881	P. serotina	Prunus serotina	15.2	13	6
T4C1			P. serotina	Prunus serotina	6.5
T4C1			Persea aff. americana	Beilschmiedia mexicana	11
T4C1	99	1883	Aguacate	Beilschmiedia mexicana	3	6	3
T4C1	99	1883	Aguacate	Beilschmiedia mexicana	7.7	8.5	6.3
T4C1			P. serotina	Prunus serotina	5.2
T4C1			Melastomataceae	Conostegia arborea	2

## Sheet: Transect_3
	Distace (km)	Altitud3	Common name	Tree species	DAP	C	H
T3C3	4	1874	Helecho peludo	Dicksonia sellowiana	29	6	6
T3C3	6	1874	Betulaceae	Betulaceae	16	5	7.5
T3C3	7	1874	Garria	Garria	7.2	5	7
T3C3	7.5	1874	Helecho peludo	Dicksonia sellowiana	25.5	2.3	2.5
T3C3	8	1874	Garria	Garria	26	2	3
T3C3	9	1874	Garria	Garria	0	8	8
T3C3	11	1874	Solanacea	Solanacea	2.5	3.3	4.5
T3C3	12	1874	Oreopanax	Oreopanax xalapensis	25	6	7
T3C3	13	1875	Helecho peludo	Dicksonia sellowiana	43	4.5	7
T3C3	15	1875	Helecho peludo	Dicksonia sellowiana	26.5	5	5.3
T3C3	17	1875	Helecho peludo	Dicksonia sellowiana	17	4.5	2.5
T3C3	19	1879	Prunus?	Prunus serotina	6	3	8
	23	1879	Peludita	Styrax glabrescens	49.5	12	23
	24	1878	Aserrada	Perrotetia ovata	3	2.5	3.5
	25	1878	Magnolia	Magnolia schiedeana	18.3	8	17
	25	1878	Helecho peludo	Dicksonia sellowiana	24.3	8	17
	29	1880	Helecho peludo	Dicksonia sellowiana	24	8	4
	29	1880	Helecho peludo	Dicksonia sellowiana	17.7	2.3	2.5
	31	1880	Aserrado 2	Perrotetia ovata	10.5
	34	1880	Prunus (?)	Prunus serotina	10
	38	1880	Helecho peludo	Dicksonia sellowiana	20.5
	38	1880	Helecho peludo	Dicksonia sellowiana	23.6
T3C2			Helecho peludo	Dicksonia sellowiana	23.5
T3C2			Quercus insignis	Quercus insignis	21
T3C2	43	1880	Helecho punta recta	Alsophila firma	16	7	4.2
T3C2	43	1880	Prunus	Prunus serotina	10	10.5	6
T3C2			Peludita	Styrax glabrescens	16.6
T3C2			Aguacate	Beilschmiedia mexicana	5.9
T3C2			Aguacate	Beilschmiedia mexicana	3.4
T3C2			Helecho punta recta	Alsophila firma	13.5
T3C2			Helecho peludo	Dicksonia sellowiana	6
T3C2			Helecho peludo	Dicksonia sellowiana	12
T3C2			Oreopanax	Oreopanax xalapensis	1.8
T3C2			Helecho punta recta	Alsophila firma	12
T3C2	45	1880	Aguacate	Beilschmiedia mexicana	8	9	8
T3C2			Betulaceae	Betulaceae	27.2
T3C2			Oreopanax	Oreopanax xalapensis	3
T3C2			Clethra	Clethra mexicana	9
T3C2			Clethra	Clethra mexicana	3.4
T3C2			Betulaceae	Betulaceae	21
T3C2			Betulaceae	Betulaceae	5
T3C2	44	1874	Prunus serotina	Prunus serotina	3.5	4	2
T3C2			Helecho punta recta	Alsophila firma	25
T3C2			Peludita	Styrax glabrescens	23.2
T3C2			Helecho punta recta	Alsophila firma	17.4
T3C2	54	1877	Helecho peludo	Dicksonia sellowiana	26.5	2.8	3
T3C2	54	1877	Clethra	Clethra mexicana	18.5	18	5
T3C2	54	1877	Betulaceae	Betulaceae	25.5	15	7
T3C2	55	1877	Melastomataceae	Conostegia arborea	2.5	2.5	2
T3C2			Melastomataceae	Conostegia arborea	1.8	2.5	1.8
T3C2			Clethra	Clethra mexicana	25	13	3
	60	1877	Helecho peludo	Dicksonia sellowiana	25	5	3
			Helecho punta recta	Alsophila firma	16.5	5	3
			Clethra	Clethra mexicana	104.7	15	6
	64	1877	Helecho peludo	Dicksonia sellowiana	28.5	3.5	3
	64	1877	Clethra	Clethra mexicana	27.5	17	5
	65	1877	Melastomataceae	Conostegia arborea	3.8	3	2.5
			Melastomataceae	Conostegia arborea	4.2	3	2.8
			Helecho peludo	Dicksonia sellowiana	15	1.6	2
	73	1877	Quercus bebé	Quercus trinitatis	3	2.5	2
T3C1	83	1877	Helecho punta recta	Alsophila firma	8.5		4
T3C1			Melastomataceae	Conostegia arborea	13
T3C1			Solanacea	Solanacea	8.2
T3C1	83	1877	Clethra	Clethra mexicana	30	12	4
T3C1	85	1877	Solanacea	Solanacea	13.5	7.5	8
T3C1	87	1877	Helecho peludo	Dicksonia sellowiana	33.5	3	4
T3C1	87	1877	Clethra	Clethra mexicana	50	15	3
T3C1			Clethra	Clethra mexicana	21
T3C1			Helecho punta recta	Alsophila firma	20
T3C1			Helecho punta recta	Alsophila firma	16
T3C1	84	1877	Clethra	Clethra mexicana	15	10	4
T3C1			Clethra	Clethra mexicana	12
T3C1			Clethra	Clethra mexicana	30
T3C1			Clethra	Clethra mexicana	35
T3C1	89	1877	Betulaceae	Betulaceae	22	6	4
T3C1	84	1877	Helecho punta recta	Alsophila firma	25	8	5
T3C1			Ostria	Ostrya virginiana	45
T3C1			Clethra	Clethra mexicana	18
T3C1			Clethra	Clethra mexicana	30
T3C1	96	1877	Melastomataceae	Conostegia arborea	4.5	3	2
T3C1			Clethra	Clethra mexicana	12	1.8	1.5
T3C1			Clethra	Clethra mexicana	31
T3C1			Clethra	Clethra mexicana	25
T3C1			Clethra	Clethra mexicana	32

## Sheet: Transect_2
	Distace (km)	Altitude	Common name	Tree species	DAP	C	H
T2C3	0	1869	Helecho espina curva	Cyathea fulva	15.7	3	4.5
T2C3			Helecho espina curva	Cyathea fulva	14.5
T2C3			Helecho espina curva	Cyathea fulva	15
T2C3	0	1869	Melastomataceae	Conostegia arborea	5	4	5
T2C3	4	1869	Clethra	Clethra mexicana	7	4.5	8
T2C3	4		P. serotina	Prunus serotina	3.5	2.8	7
T2C3			Aguacate	Beilschmiedia mexicana	3
T2C3			Aguacate	Beilschmiedia mexicana	3
T2C3			Magnolia	Magnolia schiedeana	2.1
T2C3			Betulaceae	Betulaceae	3.2
T2C3			Aguacate	Beilschmiedia mexicana	4.7
T2C3	6	1871	Clethra	Clethra mexicana	5.5	10	3.2
T2C3			Aguacate	Beilschmiedia mexicana	4.3
T2C3		1871	Aguacate	Beilschmiedia mexicana	3.7	1.7	2.6
T2C3			Aguacate	Beilschmiedia mexicana	4.3
T2C3			Aguacate	Beilschmiedia mexicana	13.2
T2C3			Helecho espina curva	Alsophila firma	15
T2C3			Aguacate	Beilschmiedia mexicana	3.2
T2C3			Clethra	Clethra mexicana	5.2
T2C3			Q. laurina	Quercus laurina	22.5
T2C3			Haya	Fagus grandifolia subsp. mexicana	7.3
T2C3	9	1866	Aguacate	Beilschmiedia mexicana	4.2	2	5.3
T2C3	10	1866	Aguacate	Beilschmiedia mexicana	4	3.5	7.5
T2C3			Aguacate	Beilschmiedia mexicana	1.8
T2C3			Q. laurina	Quercus laurina	61.6
T2C3			Q. laurina	Quercus laurina	85.3
T2C3			Clethra	Clethra mexicana	32.5
T2C3			Aguacate	Beilschmiedia mexicana	2.8
T2C3			Aguacate	Beilschmiedia mexicana	1.8
T2C3	11	1866	Aguacate	Beilschmiedia mexicana	3.7	1.5	2.5
T2C3	12	1866	Aguacate	Beilschmiedia mexicana	5.1	1.5	3
T2C3			Aguacate	Beilschmiedia mexicana	2.7
T2C3	14	1871	Q. trinitatis	Quercus delgadoana	1.6	3.5	8
T2C3	14	1871	Q. trinitatis	Quercus delgadoana	1.3	2.5	5
T2C3	14	1872	Aguacate	Beilschmiedia mexicana	2.4	2	3
T2C3			Aguacate	Beilschmiedia mexicana	4.5
T2C3			Aguacate	Beilschmiedia mexicana	3
T2C3			Aguacate	Beilschmiedia mexicana	3.5
T2C3			P. serotina	Prunus serotina	7.7
T2C3			Clethra	Clethra mexicana	3.4
T2C3			Aguacate	Beilschmiedia mexicana	4.5
T2C3			Aguacate	Beilschmiedia mexicana	3.3
T2C3			Aguacate	Beilschmiedia mexicana	5.2
T2C3			Oreopanax	Oreopanax xalapensis	5.5
T2C3			Aguacate	Beilschmiedia mexicana	2.6
T2C3	15	1871	Aguacate	Beilschmiedia mexicana	3.2	3	1.3
T2C3			Aguacate	Beilschmiedia mexicana	5.3
T2C3			P. serotina	Prunus serotina	1.6
T2C3			Q. trinitatis	Quercus delgadoana	1.7
T2C3	16	1871	Q. laurina	Quercus laurina	15.2	15.2	5
T2C3	16	1871	P. serotina	Prunus serotina	2.1	2.5	1
T2C3			Aguacate	Beilschmiedia mexicana	3.8
T2C3			Clethra	Clethra mexicana	2.1
T2C3	19	1867	Q. insignis	Quercus insignis	59.5	35.7	10
T2C3			P. serotina	Prunus serotina	4.4
T2C3			Aguacate	Beilschmiedia mexicana	5.4
T2C3			P. serotina	Prunus serotina	2.7
T2C3			Aguacate	Beilschmiedia mexicana	7
T2C3	19	1870	Helecho espina recta	Alsophila firma	10.5	5.5	5
T2C3			Aguacate	Beilschmiedia mexicana	5.3
	21	1864	Prunus (2)	Prunus serotina	2.3	4.5	2.5
	25	1864	Clethra	Clethra mexicana	66.7	30	10
	25	1859	Q. trinitatis	Quercus delgadoana	8	3	5.5
	25	1859	Clethra	Clethra mexicana	4	6	2
	26	1859	Clethra	Clethra mexicana	7.5	9	3
	27	1859	Aguacate	Beilschmiedia mexicana	2	3.5	1.5
	28	1859	Clethra	Clethra mexicana	2.7	2.4	1
	29	1859	Clethra	Clethra mexicana	3.2	4	1
	29	1859	Clethra	Clethra mexicana	2.7	5	1
	30	1858	Quercus (4)	Quercus insignis	4	4.5	2
	31	1858	Aguacate	Persea americana	2.5	5.5	2
	31	1857	Prunus (2)	Prunus serotina	4	5.5	5
	32	1857	Aguacate	Persea americana	5	3	1.5
	39	1858	Aguacate	Persea americana	2.4	3.5	5
	39	1858	Aguacate	Persea americana	5.4	5.5	1.5
	39	1858	Aguacate	Persea americana	4.7	4	1.6
T2C2			Prunus (2)	Prunus serotina	9.2
T2C2			Prunus (2)	Prunus serotina	3.2
T2C2			Clethra	Clethra mexicana	8.5
T2C2			Aguacate	Persea americana	5.8
T2C2	45	1860	Helecho espina recta	Alsophila firma	15.8	4.3	5
T2C2			Aguacate	Persea americana	17.5
T2C2			Aguacate	Persea americana	9.4
T2C2			Aguacate	Persea americana	2.6
T2C2			Aguacate	Persea americana	5
T2C2			Aguacate	Persea americana	257
T2C2			Q. insignis	Quercus sp.	58.9
T2C2			Aguacate	Persea americana	7.5
T2C2			Magnolia	Magnolia schediana	48.7
T2C2			Oreopanax	Oreopanax xalapensis	2.7
T2C2			Aguacate	Persea americana	1.9
T2C2			Aguacate	Persea americana	5.5
T2C2	52	1868	Aguacate	Persea americana	3.2	6.8	5
T2C2			Helecho espina curva	Cyathea fulva	16
T2C2			Prunus (2)	Prunus serotina	1.7
T2C2			Aguacate	Persea americana	12.5
T2C2			Magnolia	Magnolia schediana	70
T2C2			Aguacate	Persea americana	3.2
T2C2	55	1865	Q. laurina	Quercus laurina	6	7	5
T2C2	60	1858	Q. insignis	Quercus sp.	112	40	24
	70	1858	Q. trinitatis	Quercus delgaduana	5.2	7	5
	71	1859	Aguacate	Persea americana	15.2	15.3	3
	74	1867	Q. insignis	Quercus sp.	25.5	15	17
	75	1867	Clethra	Clethra mexicana	65	34	13
T2C1			Magnolia	Magnolia schediana	35
T2C1			Clethra	Clethra mexicana	25.3
T2C1			Clethra	Clethra mexicana	6.2
T2C1			Magnolia	Magnolia schediana	35.7
T2C1			Clethra	Clethra mexicana	10
T2C1	85	1865	Q. insignis	Quercus sp.	98	35	15
T2C1			Helecho espina recta	Alsophila firma	10
T2C1			Helecho espina recta	Alsophila firma	12
T2C1	86	1868	P. serotina	Prunus serotina	3	4.5	3
T2C1			Clethra	Clethra mexicana	24
T2C1			Clethra	Clethra mexicana	8
T2C1			Clethra	Clethra mexicana	6
T2C1			Alnus	Alnus acuminata	6
T2C1			Clethra	Clethra mexicana	25
T2C1	90		Q. insignis	Quercus sp.	14	7.5	4.3
T2C1	90	1870	Clethra	Clethra mexicana	8	15	4.5
T2C1	90	1870	Betulaceae	Betulaceae	18.5	12	6
T2C1			Betulaceae	Betulaceae	9
T2C1	94	1870	Clethra	Clethra mexicana	6.5	8	3
T2C1			Clethra	Clethra mexicana	15
T2C1			Clethra	Clethra mexicana	6
T2C1			Clethra	Clethra mexicana	8
T2C1			Betulaceae	Betulaceae	3.2
T2C1			Q. laurina	Quercus laurina	15
T2C1			Q. laurina	Quercus laurina	5.2
T2C1			P. serotina	Prunus serotina	10.2
T2C1			Clethra	Clethra mexicana	152
T2C1	95	1875	Q. delgadoana	Q. delgadoana	2.5	1.1	12.3
T2C1			Clethra	Clethra mexicana	6
T2C1			Haya	Fagus grandifolia subsp. mexicana	2.5
T2C1			Haya	Fagus grandifolia subsp. mexicana	19.2

## Sheet: Transect_1
	Distace (km)	Altitude	Common name	Tree species	DAP	C	H
T1C3	0	1838	Ostria	Ostrya virginiana	1.9	7	3.2
T1C3			Ostria	Ostrya virginiana	12.5
T1C3			Q. laetha	Quercus sp.	32
T1C3	1	1835	Solanaceae	Solanaceae	30	3	6
T1C3			Ostria	Ostrya virginiana	3
T1C3			Clethra	Clethra mexicana	14
T1C3	11	1837	Q. laetha	Quercus sp.	30	28	7
T1C3	11	1837	Magnolia	Magnolia schediana	5	9	3
T1C3	11	1837	Aguacate	Beilschmiedia mexicana	20	4	12
T1C3			Clethra	Clethra mexicana	3.5
T1C3			Clethra	Clethra mexicana	3.5
T1C3			Q. laetha	Quercus sp.	2.5
T1C3			Clethra	Clethra mexicana	21
T1C3	14	1836	Q. trinitatis	Quercus delgaduana	50	21	6
T1C3			Aguacate	Beilschmiedia mexicana	4.7
T1C3	15	1836	Clethra	Clethra mexicana	15	12	5
T1C3			Magnolia	Magnolia schediana	1.6
T1C3			Magnolia	Magnolia schediana	1.7
T1C3	15	1836	Q. insignis	Quercus sp.	28.9	23	10
T1C3	16	1834	Oreopanax	Oreopanax xalapensis	5.8	3	7
T1C3	17	1834	Solanaceae	Solanaceae	1.7	2	3
T1C3	18	1834	Q. laetha	Quercus sp.	10	6	11
T1C3			Magnolia	Magnolia schediana	20
T1C3			Ostria	Ostrya virginiana	30
T1C3			Ostria	Ostrya virginiana	25
T1C3			Solanaceae	Solanaceae	17.6
T1C3			P. serontina	Prunus serotina	5.6
	21	1837	Q. laetha	Quercus sp.	32.5	12	32
	25	1837	Q. laetha	Quercus sp.	29.5	9.5	25.7
	26	1837	Solanaceae	Solanaceae	15.6	6.2	14.5
	30	1837	Q. insignis	Quercus sp.	6.7	2	8.2
	31	1838	P. serontina	Prunus serotina	2.1	1.5	4
	35	1837	Magnolia	Magnolia schediana	17.2	8	11
	36	1837	Q. laetha	Quercus sp.	16.2	7.6	16
	39	1837	Clethra	Clethra mexicana	252	7	18
	39	1837	Q. trinitatis	Quercus delgaduana	13.7	7	15.2
T1C2			Q. laetha	Quercus sp.	27.3
T1C2			P. serontina	Prunus serotina	3
T1C2			Q. trinitatis	Quercus delgaduana	8
T1C2			Clethra	Clethra mexicana	9
T1C2			Q. laetha	Quercus sp.	12.5
T1C2			P. serontina	Prunus serotina	25
T1C2			Q. trinitatis	Quercus delgaduana	3
T1C2			Acuminada	Acuminada	80
T1C2			Q. laetha	Quercus sp.	24.7
T1C2			Q. laetha	Quercus sp.	23.5
T1C2	50	1838	Haya	Fagus grandifolia subsp. mexicana	30	25	8
T1C2			Q. laetha	Quercus sp.	1.7
T1C2			Q. laetha	Quercus sp.	1.7
T1C2			Acuminada	Acuminada	23.2
T1C2			Q. laetha	Quercus sp.	25.2
T1C2			Haya	Fagus grandifolia subsp. mexicana	36.5	32.5	13.2
T1C2			Q. laetha	Quercus sp.	25.2
T1C2			Haya	Fagus grandifolia subsp. mexicana	36.5
T1C2			Q. laetha	Quercus sp.	12
T1C2			Q. trinitatis	Quercus delgaduana	6.5
T1C2	56	1837	Magnolia	Magnolia schediana	12.2	7.2	4
T1C2	57	1834	Alnus	Alnus acuminata	10.5	11.2	4
	62	1844	Alnus	Alnus acuminata	4.2	20	3
	62	1844	Q. laetha	Quercus sp.	25	20	6.5
	62	1844	Oreopanax	Oreopanax xalapensis	4.3	7	3
	66	1849	P. serontina	Prunus serotina	6.2	8.3	4.2
	71	1849	P. serontina	Prunus serotina	3.2	2.5	4.2
	71	1849	Acuminada	Acuminada	16.2	7.8	6.2
	71	1849	P. serontina	Prunus serotina	2.5	5	2.5
	75	1847	Q. insignis	Quercus sp.	87.9	35.7	12
	75	1847	P. serontina	Prunus serotina	8.5	7.2	4.5
T1C1			Oreopanax	Oreopanax xalapensis	15.7
T1C1			Clethra	Clethra mexicana	12.2
T1C1			Liquidambar	Liquidambar styraciflua	24.7
T1C1			Acuminada	Acuminada	12
T1C1			Alnus	Alnus acuminata	2.1
T1C1			Q. laetha	Quercus sp.	12
T1C1			Alnus	Alnus acuminata	2.1
T1C1			Alnus	Alnus acuminata	2.1
T1C1			Q. insignis	Quercus sp.	3
T1C1			P. serontina	Prunus serotina	3.5
T1C1			P. serontina	Prunus serotina	3.6
T1C1			Alnus	Alnus acuminata	36.6
T1C1			Oreopanax	Oreopanax xalapensis	27.4
T1C1			P. serontina	Prunus serotina	4
T1C1			Oreopanax	Oreopanax xalapensis	9.6
T1C1	87	1834	Oreopanax	Oreopanax xalapensis	17.2	7.9	18.2
T1C1			Acuminada	Acuminada	6
T1C1			Q. laetha	Quercus sp.	2.5
T1C1			Alnus	Alnus acuminata	2.2
T1C1	92	1836	Clethra	Clethra mexicana	29.2	8.5	25
T1C1			P. serontina	Prunus serotina	6.2
T1C1			Oreopanax	Oreopanax xalapensis	12.2
T1C1	100	1836	Magnolia	Magnolia schediana	120	17	15
