# Supplementary material for: Small-fragment, high turnover: soil microenvironment fluctuation effect on tree diversity in a Neotropical montane oak forest
Source: PeerJ. 2023 May 23;11:e15415. doi: 10.7717/peerj.15415 (PMC10215762; doi:10.7717/peerj.15415)
Supplement: Supplemental Information 2 [file peerj-11-15415-s002.xlsx]

## Sheet: Plots_identified species
	Common name	Nombre científico	DAP (cm)
T1C1	Alnus	Alnus acuminata Kunth	2.1
T1C1	Alnus	Alnus acuminata Kunth	2.1
T1C1	Alnus	Alnus acuminata Kunth	2.1
T1C1	Alnus	Alnus acuminata Kunth	36.6
T1C1	Alnus	Alnus acuminata Kunth	2.2
T1C1	Clethra	Clethra mexicana DC.	29.2
T1C1	Clethra	Clethra mexicana DC.	12.2
T1C1	Liquidambar	Liquidambar styraciflua L.	24.7
T1C1	Magnolia	Magnolia schiedeana Schltdl.	120
T1C1	Oreopanax	Oreopanax xalapensis (Kunth) Decne. & Planch.	17.2
T1C1	Oreopanax	Oreopanax xalapensis (Kunth) Decne. & Planch.	15.7
T1C1	Oreopanax	Oreopanax xalapensis (Kunth) Decne. & Planch.	27.4
T1C1	Oreopanax	Oreopanax xalapensis (Kunth) Decne. & Planch.	9.6
T1C1	Oreopanax	Oreopanax xalapensis (Kunth) Decne. & Planch.	12.2
T1C1	P. serontina	Prunus serotina Ehrh.	3.5
T1C1	P. serontina	Prunus serotina Ehrh.	3.6
T1C1	P. serontina	Prunus serotina Ehrh.	4
T1C1	P. serontina	Prunus serotina Ehrh.	6.2
T1C1	Q. laetha	Quercus sp. L.	12
T1C1	Q. insignis	Quercus sp. L.	3
T1C1	Q. laetha	Quercus sp. L.	2.5
T1C2	Alnus	Alnus acuminata Kunth	10.5
T1C2	Clethra	Clethra mexicana DC.	9
T1C2	Haya	Fagus grandifolia subsp. mexicana (Martínez) A.E. Murray	30
T1C2	Haya	Fagus grandifolia subsp. mexicana (Martínez) A.E. Murray	36.5
T1C2	Haya	Fagus grandifolia subsp. mexicana (Martínez) A.E. Murray	36.5
T1C2	Magnolia	Magnolia schiedeana Schltdl.	12.2
T1C2	P. serontina	Prunus serotina Ehrh.	3
T1C2	P. serontina	Prunus serotina Ehrh.	25
T1C2	Q. trinitatis	Quercus delgadoana S. Valencia, Nixon & L.M. Kelly	8
T1C2	Q. trinitatis	Quercus delgadoana S. Valencia, Nixon & L.M. Kelly	3
T1C2	Q. trinitatis	Quercus delgadoana S. Valencia, Nixon & L.M. Kelly	6.5
T1C2	Q. laetha	Quercus sp. L.	27.3
T1C2	Q. laetha	Quercus sp. L.	12.5
T1C2	Q. laetha	Quercus sp. L.	24.7
T1C2	Q. laetha	Quercus sp. L.	23.5
T1C2	Q. laetha	Quercus sp. L.	1.7
T1C2	Q. laetha	Quercus sp. L.	1.7
T1C2	Q. laetha	Quercus sp. L.	25.2
T1C2	Q. laetha	Quercus sp. L.	25.2
T1C2	Q. laetha	Quercus sp. L.	12
T1C3	Aguacate	Beilschmiedia mexicana (Mez) Kosterm.	20
T1C3	Aguacate	Beilschmiedia mexicana (Mez) Kosterm.	4.7
T1C3	Clethra	Clethra mexicana DC.	15
T1C3	Clethra	Clethra mexicana DC.	14
T1C3	Clethra	Clethra mexicana DC.	3.5
T1C3	Clethra	Clethra mexicana DC.	3.5
T1C3	Clethra	Clethra mexicana DC.	21
T1C3	Magnolia	Magnolia schiedeana Schltdl.	5
T1C3	Magnolia	Magnolia schiedeana Schltdl.	1.6
T1C3	Magnolia	Magnolia schiedeana Schltdl.	1.7
T1C3	Magnolia	Magnolia schiedeana Schltdl.	20
T1C3	Oreopanax	Oreopanax xalapensis (Kunth) Decne. & Planch.	5.8
T1C3	Ostria	Ostrya virginiana (Mill.) K. Koch	1.9
T1C3	Ostria	Ostrya virginiana (Mill.) K. Koch	12.5
T1C3	Ostria	Ostrya virginiana (Mill.) K. Koch	3
T1C3	Ostria	Ostrya virginiana (Mill.) K. Koch	30
T1C3	Ostria	Ostrya virginiana (Mill.) K. Koch	25
T1C3	P. serontina	Prunus serotina Ehrh.	5.6
T1C3	Q. trinitatis	Quercus delgadoana S. Valencia, Nixon & L.M. Kelly	50
T1C3	Q. laetha	Quercus sp. L.	30
T1C3	Q. insignis	Quercus sp. L.	28.9
T1C3	Q. laetha	Quercus sp. L.	10
T1C3	Q. laetha	Quercus sp. L.	32
T1C3	Q. laetha	Quercus sp. L.	2.5
T1C3	Solanaceae	Solanaceae Adans.	30
T1C3	Solanaceae	Solanaceae Adans.	1.7
T1C3	Solanaceae	Solanaceae Adans.	17.6	15.8618
T2C1	Alnus	Alnus acuminata Kunth	6
T2C1	Helecho espina recta	Alsophila firma (Baker) D.S. Conant	10
T2C1	Helecho espina recta	Alsophila firma (Baker) D.S. Conant	12
T2C1	Betulaceae	Betulaceae Gray	18.5
T2C1	Betulaceae	Betulaceae Gray	9
T2C1	Betulaceae	Betulaceae Gray	3.2
T2C1	Clethra	Clethra mexicana DC.	25.3
T2C1	Clethra	Clethra mexicana DC.	6.2
T2C1	Clethra	Clethra mexicana DC.	10
T2C1	Clethra	Clethra mexicana DC.	24
T2C1	Clethra	Clethra mexicana DC.	8
T2C1	Clethra	Clethra mexicana DC.	6
T2C1	Clethra	Clethra mexicana DC.	25
T2C1	Clethra	Clethra mexicana DC.	8
T2C1	Clethra	Clethra mexicana DC.	6.5
T2C1	Clethra	Clethra mexicana DC.	15
T2C1	Clethra	Clethra mexicana DC.	6
T2C1	Clethra	Clethra mexicana DC.	8
T2C1	Clethra	Clethra mexicana DC.	152
T2C1	Clethra	Clethra mexicana DC.	6
T2C1	Magnolia	Magnolia schiedeana Schltdl.	35
T2C1	Magnolia	Magnolia schiedeana Schltdl.	35.7
T2C1	Haya	Ostrya virginiana (Mill.) K. Koch	2.5
T2C1	Haya	Ostrya virginiana (Mill.) K. Koch	19.2
T2C1	P. serotina	Prunus serotina Ehrh.	3
T2C1	P. serotina	Prunus serotina Ehrh.	10.2
T2C1	Q. delgadoana	Quercus delgadoana S. Valencia, Nixon & L.M. Kelly	2.5
T2C1	Q. laurina	Quercus laurina Bonpl.	15
T2C1	Q. laurina	Quercus laurina Bonpl.	5.2
T2C1	Q. insignis	Quercus sp. L.	98
T2C1	Q. insignis	Quercus sp. L.	14
T2C2	Helecho espina recta	Alsophila firma (Baker) D.S. Conant	15.8
T2C2	Clethra	Clethra mexicana DC.	8.5
T2C2	Helecho espina curva	Cyathea fulva (M. Martens & Galeotti) Fée	16
T2C2	Magnolia	Magnolia schiedeana Schltdl.	48.7
T2C2	Magnolia	Magnolia schiedeana Schltdl.	70
T2C2	Oreopanax	Oreopanax xalapensis (Kunth) Decne. & Planch.	2.7
T2C2	Aguacate	Persea americana Mill.	5.8
T2C2	Aguacate	Persea americana Mill.	17.5
T2C2	Aguacate	Persea americana Mill.	9.4
T2C2	Aguacate	Persea americana Mill.	2.6
T2C2	Aguacate	Persea americana Mill.	5
T2C2	Aguacate	Persea americana Mill.	257
T2C2	Aguacate	Persea americana Mill.	7.5
T2C2	Aguacate	Persea americana Mill.	1.9
T2C2	Aguacate	Persea americana Mill.	5.5
T2C2	Aguacate	Persea americana Mill.	3.2
T2C2	Aguacate	Persea americana Mill.	12.5
T2C2	Aguacate	Persea americana Mill.	3.2
T2C2	Prunus (2)	Prunus serotina Ehrh.	9.2
T2C2	Prunus (2)	Prunus serotina Ehrh.	3.2
T2C2	Prunus (2)	Prunus serotina Ehrh.	1.7
T2C2	Q. laurina	Quercus laurina Bonpl.	6
T2C2	Q. insignis	Quercus sp. L.	58.9
T2C2	Q. insignis	Quercus sp. L.	112
T2C3	Helecho espina curva	Alsophila firma (Baker) D.S. Conant	15
T2C3	Helecho espina recta	Alsophila firma (Baker) D.S. Conant	10.5
T2C3	Aguacate	Beilschmiedia mexicana (Mez) Kosterm.	3
T2C3	Aguacate	Beilschmiedia mexicana (Mez) Kosterm.	3
T2C3	Aguacate	Beilschmiedia mexicana (Mez) Kosterm.	4.7
T2C3	Aguacate	Beilschmiedia mexicana (Mez) Kosterm.	4.3
T2C3	Aguacate	Beilschmiedia mexicana (Mez) Kosterm.	3.7
T2C3	Aguacate	Beilschmiedia mexicana (Mez) Kosterm.	4.3
T2C3	Aguacate	Beilschmiedia mexicana (Mez) Kosterm.	13.2
T2C3	Aguacate	Beilschmiedia mexicana (Mez) Kosterm.	3.2
T2C3	Aguacate	Beilschmiedia mexicana (Mez) Kosterm.	4.2
T2C3	Aguacate	Beilschmiedia mexicana (Mez) Kosterm.	4
T2C3	Aguacate	Beilschmiedia mexicana (Mez) Kosterm.	1.8
T2C3	Aguacate	Beilschmiedia mexicana (Mez) Kosterm.	2.8
T2C3	Aguacate	Beilschmiedia mexicana (Mez) Kosterm.	1.8
T2C3	Aguacate	Beilschmiedia mexicana (Mez) Kosterm.	3.7
T2C3	Aguacate	Beilschmiedia mexicana (Mez) Kosterm.	5.1
T2C3	Aguacate	Beilschmiedia mexicana (Mez) Kosterm.	2.7
T2C3	Aguacate	Beilschmiedia mexicana (Mez) Kosterm.	2.4
T2C3	Aguacate	Beilschmiedia mexicana (Mez) Kosterm.	4.5
T2C3	Aguacate	Beilschmiedia mexicana (Mez) Kosterm.	3
T2C3	Aguacate	Beilschmiedia mexicana (Mez) Kosterm.	3.5
T2C3	Aguacate	Beilschmiedia mexicana (Mez) Kosterm.	4.5
T2C3	Aguacate	Beilschmiedia mexicana (Mez) Kosterm.	3.3
T2C3	Aguacate	Beilschmiedia mexicana (Mez) Kosterm.	5.2
T2C3	Aguacate	Beilschmiedia mexicana (Mez) Kosterm.	2.6
T2C3	Aguacate	Beilschmiedia mexicana (Mez) Kosterm.	3.2
T2C3	Aguacate	Beilschmiedia mexicana (Mez) Kosterm.	5.3
T2C3	Aguacate	Beilschmiedia mexicana (Mez) Kosterm.	3.8
T2C3	Aguacate	Beilschmiedia mexicana (Mez) Kosterm.	5.4
T2C3	Aguacate	Beilschmiedia mexicana (Mez) Kosterm.	7
T2C3	Aguacate	Beilschmiedia mexicana (Mez) Kosterm.	5.3
T2C3	Betulaceae	Betulaceae Gray	3.2
T2C3	Clethra	Clethra mexicana DC.	7
T2C3	Clethra	Clethra mexicana DC.	5.5
T2C3	Clethra	Clethra mexicana DC.	5.2
T2C3	Clethra	Clethra mexicana DC.	32.5
T2C3	Clethra	Clethra mexicana DC.	3.4
T2C3	Clethra	Clethra mexicana DC.	2.1
T2C3	Melastomataceae	Conostegia arborea Steud.	5
T2C3	Helecho espina curva	Cyathea fulva (M. Martens & Galeotti) Fée	15.7
T2C3	Helecho espina curva	Cyathea fulva (M. Martens & Galeotti) Fée	14.5
T2C3	Helecho espina curva	Cyathea fulva (M. Martens & Galeotti) Fée	15
T2C3	Magnolia	Magnolia schiedeana Schltdl.	2.1
T2C3	Oreopanax	Oreopanax xalapensis (Kunth) Decne. & Planch.	5.5
T2C3	Haya	Ostrya virginiana (Mill.) K. Koch	7.3
T2C3	P. serotina	Prunus serotina Ehrh.	3.5
T2C3	P. serotina	Prunus serotina Ehrh.	7.7
T2C3	P. serotina	Prunus serotina Ehrh.	1.6
T2C3	P. serotina	Prunus serotina Ehrh.	2.1
T2C3	P. serotina	Prunus serotina Ehrh.	4.4
T2C3	P. serotina	Prunus serotina Ehrh.	2.7
T2C3	Q. trinitatis	Quercus delgadoana S. Valencia, Nixon & L.M. Kelly	1.6
T2C3	Q. trinitatis	Quercus delgadoana S. Valencia, Nixon & L.M. Kelly	1.3
T2C3	Q. trinitatis	Quercus delgadoana S. Valencia, Nixon & L.M. Kelly	1.7
T2C3	Q. insignis	Quercus insignis M. Martens & Galeotti	59.5
T2C3	Q. laurina	Quercus laurina Bonpl.	22.5
T2C3	Q. laurina	Quercus laurina Bonpl.	61.6
T2C3	Q. laurina	Quercus laurina Bonpl.	85.3
T2C3	Q. laurina	Quercus laurina Bonpl.	15.2	15.9435
T3C1	Helecho punta recta	Alsophila firma (Baker) D.S. Conant	8.5
T3C1	Helecho punta recta	Alsophila firma (Baker) D.S. Conant	20
T3C1	Helecho punta recta	Alsophila firma (Baker) D.S. Conant	16
T3C1	Helecho punta recta	Alsophila firma (Baker) D.S. Conant	25
T3C1	Betulaceae	Betulaceae Gray	22
T3C1	Clethra	Clethra mexicana DC.	30
T3C1	Clethra	Clethra mexicana DC.	50
T3C1	Clethra	Clethra mexicana DC.	21
T3C1	Clethra	Clethra mexicana DC.	15
T3C1	Clethra	Clethra mexicana DC.	12
T3C1	Clethra	Clethra mexicana DC.	30
T3C1	Clethra	Clethra mexicana DC.	35
T3C1	Clethra	Clethra mexicana DC.	18
T3C1	Clethra	Clethra mexicana DC.	30
T3C1	Clethra	Clethra mexicana DC.	12
T3C1	Clethra	Clethra mexicana DC.	31
T3C1	Clethra	Clethra mexicana DC.	25
T3C1	Clethra	Clethra mexicana DC.	32
T3C1	Melastomataceae	Conostegia arborea Steud.	13
T3C1	Melastomataceae	Conostegia arborea Steud.	4.5
T3C1	Helecho peludo	Dicksonia sellowiana Hook.	33.5
T3C1	Ostria	Ostrya virginiana (Mill.) K. Koch	45
T3C1	Solanacea	Solanaceae Adans.	8.2
T3C1	Solanacea	Solanaceae Adans.	13.5
T3C2	Helecho punta recta	Alsophila firma (Baker) D.S. Conant	16
T3C2	Helecho punta recta	Alsophila firma (Baker) D.S. Conant	13.5
T3C2	Helecho punta recta	Alsophila firma (Baker) D.S. Conant	12
T3C2	Helecho punta recta	Alsophila firma (Baker) D.S. Conant	25
T3C2	Helecho punta recta	Alsophila firma (Baker) D.S. Conant	17.4
T3C2	Aguacate	Beilschmiedia mexicana (Mez) Kosterm.	5.9
T3C2	Aguacate	Beilschmiedia mexicana (Mez) Kosterm.	3.4
T3C2	Aguacate	Beilschmiedia mexicana (Mez) Kosterm.	8
T3C2	Betulaceae	Betulaceae Gray	27.2
T3C2	Betulaceae	Betulaceae Gray	21
T3C2	Betulaceae	Betulaceae Gray	5
T3C2	Betulaceae	Betulaceae Gray	25.5
T3C2	Clethra	Clethra mexicana DC.	9
T3C2	Clethra	Clethra mexicana DC.	3.4
T3C2	Clethra	Clethra mexicana DC.	18.5
T3C2	Clethra	Clethra mexicana DC.	25
T3C2	Melastomataceae	Conostegia arborea Steud.	2.5
T3C2	Melastomataceae	Conostegia arborea Steud.	1.8
T3C2	Helecho peludo	Dicksonia sellowiana Hook.	23.5
T3C2	Helecho peludo	Dicksonia sellowiana Hook.	6
T3C2	Helecho peludo	Dicksonia sellowiana Hook.	12
T3C2	Helecho peludo	Dicksonia sellowiana Hook.	26.5
T3C2	Oreopanax	Oreopanax xalapensis (Kunth) Decne. & Planch.	1.8
T3C2	Oreopanax	Oreopanax xalapensis (Kunth) Decne. & Planch.	3
T3C2	Prunus	Prunus serotina Ehrh.	10
T3C2	Prunus serotina	Prunus serotina Ehrh.	3.5
T3C2	Quercus insignis	Quercus insignis M. Martens & Galeotti	21
T3C2	Peludita	Styrax glabrescens Benth.	16.6
T3C2	Peludita	Styrax glabrescens Benth.	23.2
T3C3	Betulaceae	Betulaceae Gray	16
T3C3	Helecho peludo	Dicksonia sellowiana Hook.	29
T3C3	Helecho peludo	Dicksonia sellowiana Hook.	25.5
T3C3	Helecho peludo	Dicksonia sellowiana Hook.	43
T3C3	Helecho peludo	Dicksonia sellowiana Hook.	26.5
T3C3	Helecho peludo	Dicksonia sellowiana Hook.	17
T3C3	Oreopanax	Oreopanax xalapensis (Kunth) Decne. & Planch.	25
T3C3	Prunus?	Prunus serotina Ehrh.	6
T3C3	Solanacea	Solanaceae Adans.	2.5	18.1919
T4C1	Helecho punta recta	Alsophila firma (Baker) D.S. Conant	13
T4C1	Helecho punta recta	Alsophila firma (Baker) D.S. Conant	17
T4C1	Aguacate	Beilschmiedia mexicana (Mez) Kosterm.	4.2
T4C1	Aguacate	Beilschmiedia mexicana (Mez) Kosterm.	2.3
T4C1	Aguacate	Beilschmiedia mexicana (Mez) Kosterm.	1.5
T4C1	Aguacate	Beilschmiedia mexicana (Mez) Kosterm.	5.2
T4C1	Aguacate	Beilschmiedia mexicana (Mez) Kosterm.	3.7
T4C1	Aguacate	Beilschmiedia mexicana (Mez) Kosterm.	12.4
T4C1	Aguacate	Beilschmiedia mexicana (Mez) Kosterm.	1.8
T4C1	Aguacate	Beilschmiedia mexicana (Mez) Kosterm.	12
T4C1	Aguacate	Beilschmiedia mexicana (Mez) Kosterm.	17.8
T4C1	Aguacate	Beilschmiedia mexicana (Mez) Kosterm.	5.6
T4C1	Aguacate	Beilschmiedia mexicana (Mez) Kosterm.	2.6
T4C1	Aguacate	Beilschmiedia mexicana (Mez) Kosterm.	4.5
T4C1	Aguacate	Beilschmiedia mexicana (Mez) Kosterm.	5.2
T4C1	Aguacate	Beilschmiedia mexicana (Mez) Kosterm.	2
T4C1	Aguacate	Beilschmiedia mexicana (Mez) Kosterm.	12.5
T4C1	Persea aff. americana	Beilschmiedia mexicana (Mez) Kosterm.	11
T4C1	Aguacate	Beilschmiedia mexicana (Mez) Kosterm.	3
T4C1	Aguacate	Beilschmiedia mexicana (Mez) Kosterm.	7.7
T4C1	Melastomataceae	Conostegia arborea Steud.	2
T4C1	Magnolia schediana	Magnolia schiedeana Schltdl.	5.4
T4C1	Magnolia schediana	Magnolia schiedeana Schltdl.	13
T4C1	Magnolia schediana	Magnolia schiedeana Schltdl.	3.5
T4C1	Magnolia schediana	Magnolia schiedeana Schltdl.	11
T4C1	Magnolia schediana	Magnolia schiedeana Schltdl.	29.7
T4C1	Haya	Ostrya virginiana (Mill.) K. Koch	51
T4C1	Haya	Ostrya virginiana (Mill.) K. Koch	6.5
T4C1	Haya	Ostrya virginiana (Mill.) K. Koch	83
T4C1	P. serotina	Prunus serotina Ehrh.	3.5
T4C1	P. serotina	Prunus serotina Ehrh.	4.5
T4C1	P. serotina	Prunus serotina Ehrh.	10.8
T4C1	P. serotina	Prunus serotina Ehrh.	2.4
T4C1	P. serotina	Prunus serotina Ehrh.	22
T4C1	P. serotina	Prunus serotina Ehrh.	2.5
T4C1	P. serotina	Prunus serotina Ehrh.	11.7
T4C1	P. serotina	Prunus serotina Ehrh.	25
T4C1	P. serotina	Prunus serotina Ehrh.	9
T4C1	P. serotina	Prunus serotina Ehrh.	4.5
T4C1	P. serotina	Prunus serotina Ehrh.	5.3
T4C1	P. serotina	Prunus serotina Ehrh.	9.5
T4C1	P. serotina	Prunus serotina Ehrh.	7.5
T4C1	P. serotina	Prunus serotina Ehrh.	8
T4C1	P. serotina	Prunus serotina Ehrh.	5.3
T4C1	P. serotina	Prunus serotina Ehrh.	15.2
T4C1	P. serotina	Prunus serotina Ehrh.	6.5
T4C1	P. serotina	Prunus serotina Ehrh.	5.2
T4C1	Quercus laurina	Quercus delgadoana S. Valencia, Nixon & L.M. Kelly	11
T4C2	Helecho punta recta	Alsophila firma (Baker) D.S. Conant	15.2
T4C2	Helecho punta recta	Alsophila firma (Baker) D.S. Conant	20
T4C2	Helecho punta recta	Alsophila firma (Baker) D.S. Conant	22.5
T4C2	Helecho punta recta	Alsophila firma (Baker) D.S. Conant	25.2
T4C2	Helecho punta recta	Alsophila firma (Baker) D.S. Conant	25.2
T4C2	Helecho punta recta	Alsophila firma (Baker) D.S. Conant	25
T4C2	Clethra	Clethra mexicana DC.	17
T4C2	Clethra	Clethra mexicana DC.	17.2
T4C2	Helecho peludito	Dicksonia sellowiana Hook.	17.2
T4C2	Magnolia schediana	Magnolia schiedeana Schltdl.	33
T4C2	Magnolia schediana	Magnolia schiedeana Schltdl.	11.6
T4C2	Magnolia schediana	Magnolia schiedeana Schltdl.	54.5
T4C2	P. serotina	Prunus serotina Ehrh.	7.5
T4C2	P. serotina	Prunus serotina Ehrh.	5.7
T4C2	P. serotina	Prunus serotina Ehrh.	9
T4C2	P. serotina	Prunus serotina Ehrh.	18.3
T4C2	P. serotina	Prunus serotina Ehrh.	12.5
T4C2	P. serotina	Prunus serotina Ehrh.	8
T4C2	P. serotina	Prunus serotina Ehrh.	52
T4C2	Quercus laurina	Quercus delgadoana S. Valencia, Nixon & L.M. Kelly	30
T4C2	Encino 3	Quercus insignis M. Martens & Galeotti	5
T4C2	Solanaceae	Solanaceae Adans.	3.5
T4C2	Hoja peludita	Styrax glabrescens Benth.	48.5
T4C2	Hoja compuesta	Turpinia insignis (Kunth) Tul.	30
T4C3	Helecho punta recta	Alsophila firma (Baker) D.S. Conant	13
T4C3	Clethra	Clethra mexicana DC.	19.2
T4C3	Clethra	Clethra mexicana DC.	7
T4C3	Magnolia schediana	Magnolia schiedeana Schltdl.	35
T4C3	Oreopanax	Oreopanax xalapensis (Kunth) Decne. & Planch.	6
T4C3	Oreopanax	Oreopanax xalapensis (Kunth) Decne. & Planch.	5.5
T4C3	Haya	Ostrya virginiana (Mill.) K. Koch	53.5
T4C3	Haya	Ostrya virginiana (Mill.) K. Koch	4
T4C3	Haya	Ostrya virginiana (Mill.) K. Koch	87
T4C3	Haya	Ostrya virginiana (Mill.) K. Koch	21.5
T4C3	Haya	Ostrya virginiana (Mill.) K. Koch	26.5
T4C3	Haya 2	Ostrya virginiana (Mill.) K. Koch	33.3
T4C3	Haya 2	Ostrya virginiana (Mill.) K. Koch	53.5
T4C3	Rosaceae	Perrottetia ovata Hemsl.	4
T4C3	Rosaceae	Perrottetia ovata Hemsl.	13.2
T4C3	P. serotina	Prunus serotina Ehrh.	3
T4C3	P. serotina	Prunus serotina Ehrh.	3.2
T4C3	P. serotina	Prunus serotina Ehrh.	2
T4C3	P. serotina	Prunus serotina Ehrh.	3
T4C3	P. serotina	Prunus serotina Ehrh.	7.5
T4C3	P. serotina	Prunus serotina Ehrh.	6.3
T4C3	P. serotina	Prunus serotina Ehrh.	5.7
T4C3	P. serotina	Prunus serotina Ehrh.	6.5
T4C3	P. serotina	Prunus serotina Ehrh.	3
T4C3	P. serotina	Prunus serotina Ehrh.	3.7
T4C3	P. serotina	Prunus serotina Ehrh.	6
T4C3	P. serotina	Prunus serotina Ehrh.	9
T4C3	P. serotina	Prunus serotina Ehrh.	4.5
T4C3	P. serotina	Prunus serotina Ehrh.	1.7
T4C3	P. serotina	Prunus serotina Ehrh.	3.2
T4C3	P. serotina	Prunus serotina Ehrh.	15.4
T4C3	P. serotina	Prunus serotina Ehrh.	8
T4C3	P. serotina	Prunus serotina Ehrh.	6.2
T4C3	P. serotina	Prunus serotina Ehrh.	10
T4C3	P. serotina	Prunus serotina Ehrh.	6
T4C3	P. serotina	Prunus serotina Ehrh.	24
T4C3	P. serotina	Prunus serotina Ehrh.	6.5
T4C3	Quercus laurina	Quercus delgadoana S. Valencia, Nixon & L.M. Kelly	19.3
T4C3	Q. laurina	Quercus delgadoana S. Valencia, Nixon & L.M. Kelly	66
T4C3	Quercus 2	Quercus meavei S. Valencia, Sabas & O.J. Soto	13.6
T4C3	Encino 3	Quercus trinitatis Trel.	7	14.7398
		0

## Sheet: Abundance_tree species
Abundance							Presence_Ausence
Tree species	T1	T2	T3	T4	COUNT.SI >0		Tree species	T1	T2	T3	T4
Alnus acuminata Kunth	6	1	0	0	2		Alnus acuminata Kunth	1	1	0	0
Alsophila firma (Baker) D.S. Conant	0	5	9	9	3		Alsophila firma (Baker) D.S. Conant	0	1	1	1
Beilschmiedia mexicana (Mez) Kosterm.	2	30	3	18	4		Beilschmiedia mexicana (Mez) Kosterm.	1	1	1	1
Betulaceae Gray	0	4	6	0	2		Betulaceae Gray	0	1	1	0
Clethra mexicana DC.	8	21	17	4	4		Clethra mexicana DC.	1	1	1	1
Conostegia arborea Steud.	0	1	4	1	3		Conostegia arborea Steud.	0	1	1	1
Cyathea fulva (M. Martens & Galeotti) Fée	0	4	0	0	1		Cyathea fulva (M. Martens & Galeotti) Fée	0	1	0	0
Dicksonia sellowiana Hook.	0	0	10	1	2		Dicksonia sellowiana Hook.	0	0	1	1
Fagus grandifolia subsp. mexicana (Martínez) A.E. Murray	3	0	0	0	1		Fagus grandifolia subsp. mexicana (Martínez) A.E. Murray	1	0	0	0
Liquidambar styraciflua L.	1	0	0	0	1		Liquidambar styraciflua L.	1	0	0	0
Magnolia schiedeana Schltdl.	6	5	0	9	3		Magnolia schiedeana Schltdl.	1	1	0	1
Oreopanax xalapensis (Kunth) Decne. & Planch.	6	2	3	2	4		Oreopanax xalapensis (Kunth) Decne. & Planch.	1	1	1	1
Ostrya virginiana (Mill.) K. Koch	5	3	1	10	4		Ostrya virginiana (Mill.) K. Koch	1	1	1	1
Perrottetia ovata Hemsl.	0	0	0	2	1		Perrottetia ovata Hemsl.	0	0	0	1
Persea americana Mill.	0	12	0	0	1		Persea americana Mill.	0	1	0	0
Prunus serotina Ehrh.	7	11	3	47	4		Prunus serotina Ehrh.	1	1	1	1
Quercus delgadoana S. Valencia, Nixon & L.M. Kelly	4	4	0	4	3		Quercus delgadoana S. Valencia, Nixon & L.M. Kelly	1	1	0	1
Quercus insignis M. Martens & Galeotti	0	1	1	1	3		Quercus insignis M. Martens & Galeotti	0	1	1	1
Quercus laurina Bonpl.	0	7	0	0	1		Quercus laurina Bonpl.	0	1	0	0
Quercus meavei S. Valencia, Sabas & O.J. Soto	0	0	0	1	1		Quercus meavei S. Valencia, Sabas & O.J. Soto	0	0	0	1
Quercus sp. L.	17	4	0	0	2		Quercus sp. L.	1	1	0	0
Quercus trinitatis Trel.	0	0	0	1	1		Quercus trinitatis Trel.	0	0	0	1
Solanaceae Adans.	3	0	3	1	3		Solanaceae Adans.	1	0	1	1
Styrax glabrescens Benth.	0	0	2	1	2		Styrax glabrescens Benth.	0	0	1	1
Turpinia insignis (Kunth) Tul.	0	0	0	1	1		Turpinia insignis (Kunth) Tul.	0	0	0	1
	68	115	62	113	358

## Sheet: TRee species_tropicos.org
Tree species identified	Tropicos.org tree species name
Alnus acuminata	Alnus acuminata Kunth
Alsophila firma	Alsophila firma (Baker) D.S. Conant
Beilschmiedia mexicana	Beilschmiedia mexicana (Mez) Kosterm.
Betulaceae	Betulaceae Gray
Clethra mexicana	Clethra mexicana DC.
Conostegia arborea	Conostegia arborea Steud.
Cyathea fulva	Cyathea fulva (M. Martens & Galeotti) Fée
Dicksonia sellowiana	Dicksonia sellowiana Hook.
Fagus grandifolia subsp. mexicana	Fagus grandifolia subsp. mexicana (Martínez) A.E. Murray
Liquidambar styraciflua	Liquidambar styraciflua L.
Magnolia schiedeana	Magnolia schiedeana Schltdl.
Oreopanax xalapensis	Oreopanax xalapensis (Kunth) Decne. & Planch.
Ostrya virginiana	Ostrya virginiana (Mill.) K. Koch
Perrottetia ovata	Perrottetia ovata Hemsl.
Persea americana	Persea americana Mill.
Prunus serotina	Prunus serotina Ehrh.
Quercus delgadoana	Quercus delgadoana S. Valencia, Nixon & L.M. Kelly
Quercus insignis	Quercus insignis M. Martens & Galeotti
Quercus laurina	Quercus laurina Bonpl.
Quercus meavei	Quercus meavei S. Valencia, Sabas & O.J. Soto
Quercus sp.	Quercus sp. L.
Quercus trinitatis	Quercus trinitatis Trel.
Solanaceae	Solanaceae Adans.
Styrax glabrescens	Styrax glabrescens Benth.
Turpinia insignis	Turpinia insignis (Kunth) Tul.

## Sheet: Microenvironmental
2019-03-22	Moisture	Temperature (°C)	Depth litter (cm)	Density (empty plots)	Density100-(#*4)1.4	pH	2019-05-24	Moisture	Temperature (°C)	Depth litter (cm)	Density (empty plots)	Density 100-(#*4)1.4	pH	2019-08-10	Moisture	Temperature (°C)	Depth litter (cm)	Density (empty plots)	Density 100-(#*4)1.4	pH	2019-10-27	Moisture	Temperature (°C)	Depth litter (cm)	Density (empty plots)	Density 100-(#*4)1.4	pH
T1C1	7.5	2	4.5	0	100	6.8	T1C1	1	6	1	0	100	6.8	T1C1	8	3	1.5	0	100	6	T1C1	6.8	-1	3	0	100	6.4
T1C1	4	4	4	0	100	6.5	T1C1	1	5	3	0	100	6.8	T1C1	1	2	1.5	0	100	6.2	T1C1	7	-1	8	0	100	6.2
T1C1	7.5	1.5	3.5	0	100	6.5	T1C1	1	5	2.5	0	100	6.8	T1C1	7	2	4.3	0	100	6	T1C1	7	-1	2	0	100	6.2
T1C1	5	2	4	0	100	6.6	T1C1	1	4	1	0	100	6.8	T1C1	1	3	2	0	100	6.4	T1C1	6.8	0	3	0	100	6.2
T1C2	6	-3	1	0	100	6.8	T1C2	2	5	7.5	0	100	6.8	T1C2	5	4	4	0	100	6.4	T1C2	7	-2	10	0	100	6.4
T1C2	8	-1	3	1	95.84	6.4	T1C2	6	4	6.5	0	100	6.8	T1C2	8	2	10	0	100	6.3	T1C2	7	-1	5.4	0	100	6.8
T1C2	8	0	3	0	100	6.6	T1C2	4	4	5.5	0	100	6.6	T1C2	7	3	4.5	1	92.24	6.4	T1C2	6.8	-1	4.5	0	100	6.6
T1C2	5	-1	2	1	95.84	6.6	T1C2	3	4	2	0	100	6.8	T1C2	7	4	4	1	92.24	6.4	T1C2	7	-1	4.5	0	100	6.2
T1C3	8	1	4	0	100	6.8	T1C3	1	5	7.5	0	100	7	T1C3	6	2	8.5	0	100	6.4	T1C3	6.8	-1	8	0	100	6.8
T1C3	8	1	5	1	95.84	6.4	T1C3	1	5	9.5	0	100	7	T1C3	8	2	4	0	100	6.2	T1C3	6.8	0	9.5	0	100	6.8
T1C3	8	0	5	0	100	6.6	T1C3	1	4	4.5	0	100	6.6	T1C3	5	2	4	0	100	6.2	T1C3	6.8	-1	7	0	100	6.6
T1C3	7	1	6	1	95.84	6.6	T1C3	1	4	3	0	100	6.8	T1C3	6	2	6	0	100	6.2	T1C3	6.8	-1	9.5	0	100	6.2
T2C1	5	0	3	0	100	6.6	T2C1	1	3	6.5	0	100	7	T2C1	2	3	11	0	100	6.4	T2C1	7	0	3	0	100	6.4
T2C1	3	1.11111	2.5	0	100	6.8	T2C1	1	3	7	0	100	7	T2C1	2	4	8	0	100	6.4	T2C1	6.8	0	8	0	100	6.8
T2C1	4.5	0	3	0	100	6.6	T2C1	1	4	5	0	100	6.8	T2C1	2	4	6	0	100	6.8	T2C1	7	0	5	0	100	6.4
T2C1	7	3.33333	6	0	100	6.6	T2C1	1	3	6	0	100	6.8	T2C1	1	3	2	0	100	6.7	T2C1	7	0	8.5	0	100	6
T2C2	3	-1.11111	1	4	83.36	6.6	T2C2	1	2	4	0	100	6.8	T2C2	3	3	4	0	100	6.4	T2C2	7	-1	6	0	100	6.4
T2C2	8	-1.11111	1	1	95.84	6.2	T2C2	1	2	5	0	100	6.8	T2C2	2	3	6	0	100	6.6	T2C2	7	-1	4	0	100	6.6
T2C2	8	0	1	0	100	6.4	T2C2	1	2	8	0	100	7	T2C2	2	2	8	0	100	6.6	T2C2	6.8	-1	7	0	100	6.8
T2C2	8	0	1	0	100	6.4	T2C2	2	2	9	0	100	6.4	T2C2	2	3	11	0	100	6.4	T2C2	6.2	-1	5.5	0	100	6.8
T2C3	7	0	3	1	95.84	6.4	T2C3	1	2	5.5	0	100	6.8	T2C3	3	2	5	0	100	6.4	T2C3	2	-1	2.5	0	100	6.2
T2C3	6	-1.11111	4	0	100	6.6	T2C3	1	2	9	0	100	6.6	T2C3	2	2	4	0	100	6.6	T2C3	7	-1	3.6	0	100	6.2
T2C3	8	0	8	0	100	6.4	T2C3	1	2	12	0	100	6.6	T2C3	6	2	8	0	100	6.6	T2C3	6.8	-1	6	0	100	6
T2C3	7	0	4	1	95.84	6.4	T2C3	1	2	11	0	100	6.8	T2C3	7	2	5	0	100	6.2	T2C3	7	-1	5.5	0	100	6.2
T3C1	8	-1.11111	4	0	100	6.4	T3C1	1	4	3	0	100	7	T3C1	8	2	4	1	92.24	6	T3C1	7	1	5	0	100	6
T3C1	8	-1.11111	6	6	75.04	6.4	T3C1	1	3	4	0	100	7	T3C1	7	3	4	0	100	6.4	T3C1	7	1	3	0	100	6.4
T3C1	5	-1.11111	7	18	25.12	6.6	T3C1	1	3	7	0	100	7	T3C1	4	3	2.5	0	100	6.4	T3C1	7	0	4.5	0	100	6.2
T3C1	8	0	4	28	-16.48	6	T3C1	1	4	5	0	100	7	T3C1	4	2	2	0	100	6.6	T3C1	6.8	0	3.5	0	100	6.4
T3C2	6	0	2.5	1	95.84	6.8	T3C2	1	5	4	0	100	6	T3C2	6	3	10	0	100	6.4	T3C2	7	1	7	0	100	6
T3C2	8	-1.11111	2	0	100	6.8	T3C2	1	4	3	0	100	7	T3C2	5	3	8.5	1	92.24	6.4	T3C2	2	1	11	0	100	6.2
T3C2	6	-1.11111	1.5	8	66.72	6.4	T3C2	1	5	7	0	100	7	T3C2	8	2	4	0	100	6.2	T3C2	6.8	1	7.5	0	100	6.8
T3C2	7	-1.11111	3	1	95.84	6.4	T3C2	2	5	6	0	100	7	T3C2	7	2	4	0	100	6.4	T3C2	7	0	4	0	100	6
T3C3	5	-1.11111	1	1	95.84	6.6	T3C3	5	4	2	0	100	6.2	T3C3	4	1	9	0	100	6	T3C3	6.8	0	3.5	0	100	6.6
T3C3	2	-1.11111	4	0	100	6.8	T3C3	3	2	3	1	95.84	6.4	T3C3	2	0	5.5	0	100	6.2	T3C3	7	0	6.5	0	100	6.6
T3C3	8	-1.11111	7	1	95.84	6.2	T3C3	3	2	1	2	91.68	6.2	T3C3	2	1	3	0	100	6.6	T3C3	7	1	5.5	0	100	6
T3C3	6	-2.22222	10	0	100	6.8	T3C3	3	2	1	2	91.68	6	T3C3	7	2	9	0	100	6.4	T3C3	6.8	0	3.6	0	100	6.2
T4C1	5	2	3.25	1	95.84	6.8	T4C1	1	4	10	0	100	7	T4C1	5	3	8	3	76.72	6.4	T4C1	6.8	0	7	0	100	6
T4C1	6.5	2	1.5	0	100	6.6	T4C1	2	3	3.5	0	100	6.8	T4C1	2	3	3.5	0	100	6.4	T4C1	7	-1	13	0	100	6
T4C1	4	1	5	0	100	6.8	T4C1	1	3	5.5	0	100	7	T4C1	4	2	7	0	100	6.2	T4C1	7	0	16	0	100	6.2
T4C1	4	1	3.5	0	100	6.6	T4C1	1	4	5.5	0	100	6.8	T4C1	3.5	3	8.5	0	100	6.4	T4C1	7	2	10	0	100	6.4
T4C2	3	2	1	0	100	6.9	T4C2	1	4	2.5	0	100	6.8	T4C2	3	3	7	1	92.24	6.4	T4C2	7	0	5	0	100	6.8
T4C2	8	1.5	0	0	100	6.6	T4C2	1	4	3.5	0	100	6.8	T4C2	6	3	5	0	100	6.4	T4C2	1	-1	15	0	100	6.4
T4C2	7	1	1.5	0	100	6.6	T4C2	1	4	5	0	100	7	T4C2	8	4	14	1	92.24	6.8	T4C2	7	-1	2.5	0	100	6.4
T4C2	6	1	0	1	95.84	6.6	T4C2	2	4	2	0	100	7	T4C2	4.5	3	1	0	100	6.4	T4C2	7	-1	4	0	100	6.6
T4C3	6.5	-1.66667	1	0	100	6.4	T4C3	1	3	2	0	100	6	T4C3	7	3	7.5	0	100	6.2	T4C3	7	0	0.5	0	100	6.6
T4C3	8	-2.22222	1	0	100	6.2	T4C3	1	4	3	0	100	6.8	T4C3	8	2	6.3	0	100	6.2	T4C3	7	0	1	0	100	6.6
T4C3	6	-3.33333	0.5	1	95.84	6.6	T4C3	1	3	2	0	100	6.4	T4C3	8	3	4	0	100	6.2	T4C3	7	1	3	0	100	6.7
T4C3	7	-2.22222	0	1	95.84	6.2	T4C3	1	3	2	0	100	6.6	T4C3	7.5	2	2	0	100	6.4	T4C3	6.8	-1	1	0	100	6.4
Promedios de cada cuadrante
2019-03-22	Moisture	Temperature (°C)	Depth litter (cm)	Cobertura (cuadros libres)	Densidad 100-(#*4)1.4	pH	2019-05-24	Moisture	Temperature (°C)	Depth litter (cm)	Cobertura (cuadros libres)	Densidad 100-(#*4)1.4	pH	2019-08-10	Moisture	Temperature (°C)	Depth litter (cm)	Cobertura (cuadros libres)	Densidad 100-(#*4)1.4	pH	2019-10-27	Moisture	Temperature (°C)	Depth litter (cm)	Cobertura (cuadros libres)	Densidad 100-(#*4)1.4	pH
T1C1	6	2.375	4	0	100	6.6	T1C1	1	5	1.875	0	100	6.8	T1C1	4.25	2.5	2.325	0	100	6.15	T1C1	6.9	-0.75	4	0	100	6.25
T1C2	6.75	-1.25	2.25	0.5	97.92	6.6	T1C2	3.75	4.25	5.375	0	100	6.75	T1C2	6.75	3.25	5.625	0.5	96.12	6.375	T1C2	6.95	-1.25	6.1	0	100	6.5
T1C3	7.75	0.75	5	0.5	97.92	6.6	T1C3	1	4.5	6.125	0	100	6.85	T1C3	6.25	2	5.625	0	100	6.25	T1C3	6.8	-0.75	8.5	0	100	6.6
T2C1	4.875	1.11111	3.625	0	100	6.65	T2C1	1	3.25	6.125	0	100	6.9	T2C1	1.75	3.5	6.75	0	100	6.575	T2C1	6.95	0	6.125	0	100	6.4
T2C2	6.75	-0.555556	1	1.25	94.8	6.4	T2C2	1.25	2	6.5	0	100	6.75	T2C2	2.25	2.75	7.25	0	100	6.5	T2C2	6.75	-1	5.625	0	100	6.65
T2C3	7	-0.277778	4.75	0.5	97.92	6.45	T2C3	1	2	9.375	0	100	6.7	T2C3	4.5	2	5.5	0	100	6.45	T2C3	5.7	-1	4.4	0	100	6.15
T3C1	7.25	-0.833333	5.25	13	45.92	6.35	T3C1	1	3.5	4.75	0	100	7	T3C1	5.75	2.5	3.125	0.25	98.06	6.35	T3C1	6.95	0.5	4	0	100	6.25
T3C2	6.75	-0.833333	2.25	2.5	89.6	6.6	T3C2	1.25	4.75	5	0	100	6.75	T3C2	6.5	2.5	6.625	0.25	98.06	6.35	T3C2	5.7	0.75	7.375	0	100	6.25
T3C3	5.25	-1.38889	5.5	0.5	97.92	6.6	T3C3	3.5	2.5	1.75	1.25	94.8	6.2	T3C3	3.75	1	6.625	0	100	6.3	T3C3	6.9	0.25	4.775	0	100	6.35
T4C1	4.875	1.5	3.3125	0.25	98.96	6.7	T4C1	1.25	3.5	6.125	0	100	6.9	T4C1	3.625	2.75	6.75	0.75	94.18	6.35	T4C1	6.95	0.25	11.5	0	100	6.15
T4C2	6	1.375	0.625	0.25	98.96	6.675	T4C2	1.25	4	3.25	0	100	6.9	T4C2	5.375	3.25	6.75	0.5	96.12	6.5	T4C2	5.5	-0.75	6.625	0	100	6.55
T4C3	6.875	-2.36111	0.625	0.5	97.92	6.35	T4C3	1	3.25	2.25	0	100	6.45	T4C3	7.625	2.5	4.95	0	100	6.25	T4C3	6.95	0	1.375	0	100	6.575
Promedio por Transecto
2019-03-22	Moisture	Temperature (°C)	Depth litter (cm)	Cobertura (cuadros libres)	Densidad	pH	2019-05-24	Moisture	Temperature (°C)	Depth litter (cm)	Cobertura (cuadros libres)	Densidad	pH	2019-08-10	Moisture	Temperature (°C)	Depth litter (cm)	Cobertura (cuadros libres)	Densidad	pH	2019-10-27	Moisture	Temperature (°C)	Depth litter (cm)	Cobertura (cuadros libres)	Densidad	pH
T1	6.83333	0.625	3.75	0.333333	98.6133	6.6	T1	1.91667	4.58333	4.45833	0	100	6.8	T1	5.75	2.58333	4.525	0.166667	98.7067	6.25833	T1	6.88333	-0.916667	6.2	0	100	6.45
T2	6.20833	0.0925926	3.125	0.583333	97.5733	6.5	T2	1.08333	2.41667	7.33333	0	100	6.78333	T2	2.83333	2.75	6.5	0	100	6.50833	T2	6.46667	-0.666667	5.38333	0	100	6.4
T3	6.41667	-1.01852	4.33333	5.33333	77.8133	6.51667	T3	1.91667	3.58333	3.83333	0.416667	98.2667	6.65	T3	5.33333	2	5.45833	0.166667	98.7067	6.33333	T3	6.51667	0.5	5.38333	0	100	6.28333
T4	5.91667	0.171296	1.52083	0.333333	98.6133	6.575	T4	1.16667	3.58333	3.875	0	100	6.75	T4	5.54167	2.83333	6.15	0.416667	96.7667	6.36667	T4	6.46667	-0.166667	6.5	0	100	6.425
