# Supplementary material for: Small-fragment, high turnover: soil microenvironment fluctuation effect on tree diversity in a Neotropical montane oak forest
Source: PeerJ. 2023 May 23;11:e15415. doi: 10.7717/peerj.15415 (PMC10215762; doi:10.7717/peerj.15415)
Supplement: Supplemental Information 3 [file peerj-11-15415-s003.xlsx]

## Sheet: Matríz RDA
log-10	H	C°	P(cm)	D	pH	Aa	Af	Bm	Be	Cm	Ca	Cf	Ds	Fg	Ls	Ms	Ox	Ov	Po	Pa	Ps	Qd	Qi	Ql	Qm	Qu	Qt	So	Sg	Ti
T1	0.728015	0.235213	0.675167	1.99708	0.814719	0.778151	0	0.30103	0	0.90309	0	0	0	0.477121	0	0.778151	0.778151	0.69897	0	0	0.845098	0.60206	0	0	0	1.23045	0	0.477121	0	0
T2	0.61783	0.0599979	0.747056	1.99736	0.816103	0	0.69897	1.47712	0.60206	1.32222	0	0.60206	0	0	0	0.69897	0.30103	0.477121	0	1.07918	1.04139	0.60206	0	0.845098	0	0.60206	0	0	0	0
T3	0.702933	0.102504	0.676884	1.97172	0.809279	0	0.954243	0.477121	0.778151	1.23045	0.60206	0	1	0	0	0	0.477121	0	0	0	0.477121	0	0	0	0	0	0	0.477121	0.30103	0
T4	0.678784	0.205563	0.654317	1.99495	0.814858	0	0.954243	1.25527	0	0.60206	0	0	0	0	0	0.954243	0.30103	1	0.30103	0	1.6721	0.60206	0	0	0	0	0	0	0	0
Promedio	H	C°	P(cm)	D	pH	Aa	Af	Bm	Be	Cm	Ca	Cf	Ds	Fg	Ls	Ms	Ox	Ov	Po	Pa	Ps	Qd	Qi	Ql	Qm	Qu	Qt	So	Sg	Ti
T1	5.34583	1.71875	4.73333	99.33	6.52708	6	0	2	0	8	0	0	0	3	1	6	6	5	0	0	7	4	0	0	0	17	0	3	0	0
T2	4.14792	1.14815	5.58542	99.3933	6.54792	1	5	30	4	21	1	4	0	0	0	5	2	3	0	12	11	4	1	7	0	4	0	0	0	0
T3	5.04583	1.2662	4.75208	93.6967	6.44583	0	9	3	6	17	4	0	10	0	0	0	3	1	0	0	3	0	1	0	0	0	0	3	2	0
T4	4.77292	1.60532	4.51146	98.845	6.52917	0	9	18	0	4	1	0	1	0	0	9	2	10	2	0	47	4	1	0	1	0	1	1	1	1
Average values by sampling date
	H	C°	P(cm)	C (empty plots)	D 100-(C*4)1.4	pH
T1-03/2019	6.83333	0.625	3.75	0.333333	98.6133	6.6
T1-05/2019	1.91667	4.58333	4.45833	0	100	6.8
T1-08/2019	5.75	2.58333	4.525	0.166667	98.7067	6.25833
T1-10/2019	6.88333	-0.916667	6.2	0	100	6.45
T2-03/2019	6.20833	0.0925926	3.125	0.583333	97.5733	6.5
T2-05/2019	1.08333	2.41667	7.33333	0	100	6.78333
T2-08/2019	2.83333	2.75	6.5	0	100	6.50833
T2-10/2019	6.46667	-0.666667	5.38333	0	100	6.4
T3-03/2019	6.41667	-1.01852	4.33333	5.33333	77.8133	6.51667
T3-05/2019	1.91667	3.58333	3.83333	0.416667	98.2667	6.65
T3-08/2019	5.33333	2	5.45833	0.166667	98.7067	6.33333
T3-10/2019	6.51667	0.5	5.38333	0	100	6.28333
T4-03/2019	5.91667	0.171296	1.52083	0.333333	98.6133	6.575
T4-05/2019	1.16667	3.58333	3.875	0	100	6.75
T4-08/2019	5.54167	2.83333	6.15	0.416667	96.7667	6.36667
T4-10/2019	6.46667	-0.166667	6.5	0	100	6.425
